# Supplementary material for: Development of magnetic solid phase extraction based on magnetic chitosan–graphene oxide nanoparticles and deep eutectic solvents for the determination of flavonoids by high performance liquid chromatography
Source: Royal Society of Chemistry journal article supplement (doi:10.1039/d1ay01530c), 2021-01-01
Supplement: d1ay01530c1.pdf [file d1ay01530c1.pdf]

1 **Development of magnetic solid phase extraction based on magnetic chitosan-graphene oxide**  
2 **nanoparticles and deep eutectic solvents for the determination of flavonoids by high**  
3 **performance liquid chromatography**

4 Zahra Jafari, Mohammad Reza Hadjmohammadi\*

5 Department of Analytical Chemistry, Faculty of Chemistry, University of Mazandaran,

6 NirooHavayiboulevard,47416-95447 Babolsar, Iran

7

8

9

10

11

12

13 \*Corresponding author: Prof. M.R. Hadjmohammadi, Department of Analytical Chemistry,

14 Faculty of Chemistry, University of Mazandaran, NirooHavayiboulevard,47416-95447

15 Babolsar, Iran

16 Tel.: +98 113532350; fax: +98 1135342350.

17 E-mail address: hadjmr@umz.ac.ir (M.R. Hadjmohammadi)

18

19

20

21 *Synthesis of GO*

22 Concentrated H<sub>2</sub>SO<sub>4</sub> (23 mL) was affixed to a mix of graphite powder (1.0 g) and NaNO<sub>3</sub> (0.5 g)  
23 in an ice bath and stirred. Then KmnO<sub>4</sub> (3.0 g) was added gradually to this mix for 20 min. After  
24 5 h, the mix was removed from the ice-bath and extra 3 g of potassium permanganate was affixed  
25 to the mix. After 12 h, 140 mL of water was poured into the mix. Then, 1 mL of H<sub>2</sub>O<sub>2</sub> (30% v/v)  
26 was added dropwise to the mixture subsequently until the color of the mixture changed from  
27 brownish into bright yellow. The mix was centrifuged. The obtained results were then washed with  
28 30% HCl and water until the pH reached to neutral. The finally obtained product was vacuum-  
29 dried at 50 °C.

30 *Calculation of analytical parameters*

31 Herein, to achieve the optimized efficiency of the MSPE method, extraction recovery (ER),  
32 enrichment factor (EF), and spiking recovery (SR) was employed to investigate the extraction  
33 efficiency under optimized conditions.

34 EF is defined as follows:

35 
$$\%EF = \left( \frac{C_f}{C_i} \right) \times 100$$

36 That C<sub>f</sub> and C<sub>i</sub> are the concentrations of flavonoids in the desorption phase and the initial  
37 concentration in the aqueous phase, respectively.

38 The extraction recovery of flavonoids is calculated as follows:

39 
$$ER\% = \frac{n_a}{n_d} \times 100 = \frac{C_a V_a}{C_d V_d} \times 100 = EF \times \frac{V_a}{V_d} \times 100$$

40 where  $n_a$  the number of moles of analytes in the desorption phase and  $n_d$  number of moles of  
41 analytes in the sample solution. Also,  $V_a$  and  $V_d$  are the volumes of desorption solvent and sample  
42 solution, respectively.

43 The spiking recovery (SR) was applied in the analysis of real samples and is defined by the  
44 following equation:

$$45 \quad \text{Spiking recovery (\%)} = \frac{C_{found} - C_{real}}{C_{added}} \times 100$$

46 Here,  $C_{found}$  shows the concentrations of flavonoids after adding a specific amount of standard into  
47 the real sample,  $C_{real}$  is the flavonoids initial concentration in the real samples, and  $C_{added}$  is the  
48 concentration of the standard solution spiked into the real samples.

49 The ME% was investigated by the ratio of the slopes of the calibration curves in the desorption  
50 solvent to slopes of the calibration curves in the matrix and determined as:

$$51 \quad ME\% = \frac{(\text{slope in matrix}) - (\text{slope in desorption solvent})}{(\text{slope in desorption solvent})} \times 100$$

52

53

54

55

56

57

58 **Figure S1.** FT-IR spectra of the prepared DES, aloe vera gel, choline chloride, urea.

59 **Figure S2.** Pareto chart of the standardized effects obtained from a Plackett-Burman design.

60 **Figure S3.** Compare the desorption efficiency of DES with the conventional eluents such as  
61 methanol, acetonitrile, ethanol and isopropanol.

62 **Figure S4.** Extraction efficiency of target analytes obtained by the GO, Fe<sub>3</sub>O<sub>4</sub>-GO and Fe<sub>3</sub>O<sub>4</sub>-CS-  
63 GO

64

65

66

67

68

69

70

71

72

73

74

75

76

77

78

79

80

81

82

83

84

85

86

87 **Table1S.** The experimental variable and levels of the Plackett-Burman design

88

| 89 Variables                         | Symbols | Low(-1) | High(1) |
|--------------------------------------|---------|---------|---------|
| 91 Sorbent amount                    | A       | 5       | 15      |
| 92 Extraction time (min)             | B       | 2       | 15      |
| 93 Desorbtion time (min)             | C       | 2       | 10      |
| 94 pH                                | D       | 3       | 7       |
| 95 elution solvent volume ( $\mu$ L) | E       | 100     | 500     |
| 96 Amount of salt 20 W/V%            | F       | 0       | 20      |

97

98

99

100

101

102

103

104

105

106

107

108

109

110

111

112

113

114

115

116

117 **Table S2.** Analysis of variance table (ANOVA) of Plackett-Burman design

| Source          | df <sup>a</sup> | Sum of Squares | Mean Square | <i>F-Ratio</i> | <i>P-Value</i> |
|-----------------|-----------------|----------------|-------------|----------------|----------------|
| sorbent amount  | 1               | 1655645684     | 1655645684  | 29.88          | 0.003          |
| extraction time | 1               | 761183194      | 761183194   | 13.74          | 0.014          |
| Desorb time     | 1               | 12724621       | 12724621    | 0.23           | 0.652          |
| pH              | 1               | 118308920      | 118308920   | 2.14           | 0.204          |
| solvent volume  | 1               | 3399357070     | 3399357070  | 61.36          | 0.001          |
| Salt effect     | 1               | 713313780      | 713313780   | 12.87          | 0.016          |
| Error           | 5               | 277022368      | 55404474    |                |                |
| Total           | 11              | 6937555637     |             |                |                |

118 <sup>a</sup> degree of freedom

119

120

121

122

123

124

125

126

127

128

129

130

131

132

133

134

135

136 **Table S3.** The experimental design matrix and response of the Box-Bahnken design

| 137 | Extraction parameters |    |    |    | response surface |        |
|-----|-----------------------|----|----|----|------------------|--------|
| 138 | Numbers               | A  | B  | C  | D                |        |
| 139 | 1                     | 0  | -1 | 0  | 1                | 153995 |
| 140 | 2                     | 0  | 1  | 0  | -1               | 150100 |
| 141 | 3                     | 1  | 0  | 1  | 0                | 160347 |
| 142 | 4                     | 0  | 0  | 0  | 0                | 143579 |
| 143 | 5                     | -1 | 0  | -1 | 0                | 153745 |
| 144 | 6                     | -1 | 1  | 0  | 0                | 156817 |
| 145 | 7                     | 0  | 0  | -1 | -1               | 141956 |
| 146 | 8                     | 0  | 0  | 0  | 0                | 150135 |
| 147 | 9                     | 0  | 1  | -1 | 0                | 150566 |
| 148 | 10                    | 0  | 0  | -1 | 1                | 151011 |
| 149 | 11                    | 1  | 0  | 0  | -1               | 146446 |
| 150 | 12                    | 0  | -1 | -1 | 0                | 152644 |
| 151 | 13                    | 0  | 0  | 0  | 0                | 145728 |
| 152 | 14                    | -1 | -1 | 0  | 0                | 161210 |
| 153 | 15                    | 1  | 1  | 0  | 0                | 167071 |
| 154 | 16                    | -1 | 0  | 1  | 0                | 158617 |
| 155 | 17                    | 0  | 1  | 1  | 0                | 168390 |
| 156 | 18                    | -1 | 0  | 0  | 1                | 159501 |
| 157 | 19                    | 1  | -1 | 0  | 0                | 145975 |
| 158 | 20                    | -1 | 0  | 0  | -1               | 151528 |
| 159 | 21                    | 0  | -1 | 0  | -1               | 153825 |
| 160 | 22                    | 0  | 0  | 1  | -1               | 152871 |
| 161 | 23                    | 1  | 0  | 0  | 1                | 157687 |
| 162 | 24                    | 1  | 0  | -1 | 0                | 146011 |
| 163 | 25                    | 0  | -1 | 1  | 0                | 160108 |
| 164 | 26                    | 0  | 0  | 1  | 1                | 164043 |
| 165 | 27                    | 0  | 1  | 0  | 1                | 163904 |

166

167 **Table S4.** Analysis of Variance (ANOVA) table of Box –Behnken design

| 168 | Source      | DF | Sum of Squares | Mean Square | F-Value | P-Value |
|-----|-------------|----|----------------|-------------|---------|---------|
| 169 | A           | 1  | 33915856       | 33915856    | 14.35   | 0.002   |
| 170 | B           | 1  | 59857800       | 59857800    | 25.32   | 0.000   |
| 171 | C           | 1  | 390336133      | 390336133   | 165.11  | 0.000   |
| 172 | D           | 1  | 237763519      | 237763519   | 100.57  | 0.000   |
| 173 | AA          | 1  | 151360195      | 151360195   | 64.02   | 0.000   |
| 174 | BB          | 1  | 323080978      | 323080978   | 136.66  | 0.000   |
| 175 | CC          | 1  | 106102409      | 106102409   | 44.88   | 0.000   |
| 176 | DD          | 1  | 41208249       | 41208249    | 17.43   | 0.001   |
| 177 | AB          | 1  | 192918210      | 192918210   | 81.60   | 0.000   |
| 178 | AC          | 1  | 22406022       | 22406022    | 9.48    | 0.008   |
| 179 | AD          | 1  | 26832400       | 26832400    | 11.35   | 0.005   |
| 180 | BD          | 1  | 46471489       | 46471489    | 19.66   | 0.001   |
| 181 | Error       | 14 | 33097994       | 2364142     |         |         |
| 182 | Lack-of-Fit | 12 | 28515852       | 2376321     | 1.04    | 0.591   |
| 183 | Pure Error  | 2  | 4582142        | 2291071     |         |         |
| 184 | Total       | 26 | 1424041226     |             |         |         |

185

186

187

188

189



190

191 **Table S5.** Estimated determination coefficient of the BBD design

| R <sup>2</sup> | R <sup>2</sup> (pred) | R <sup>2</sup> (adj) |
|----------------|-----------------------|----------------------|
| 97.68%         | 89.41%                | 95.68%               |

192

193

194

195

196 **Table S6.** Optimized value of the factors obtained from BBD design (coded and un-coded values).

| Factor          | pH | Extraction time | Salt effect | Solvent volume |
|-----------------|----|-----------------|-------------|----------------|
| Coded value     | -1 | + 1             | +1          | 1              |
| un-coded values | 3  | 15              | 20% (w/v)   | 500            |

197

198

199

200

201

202

203

204

205

206

207

208

209

210

211

212

213

214

215

216

217 **Table S7. Matrix effect (ME%) for real samples**

| Sample                 | Matrix effect<br>100 $\mu\text{g L}^{-1}$ |
|------------------------|-------------------------------------------|
| Natural orange juice   | 96                                        |
| onion juice            | 93                                        |
| Commercial apple juice | 96                                        |
| Natural apple juice    | 94                                        |
| Green tea              | 90                                        |

218

219

220

221

222

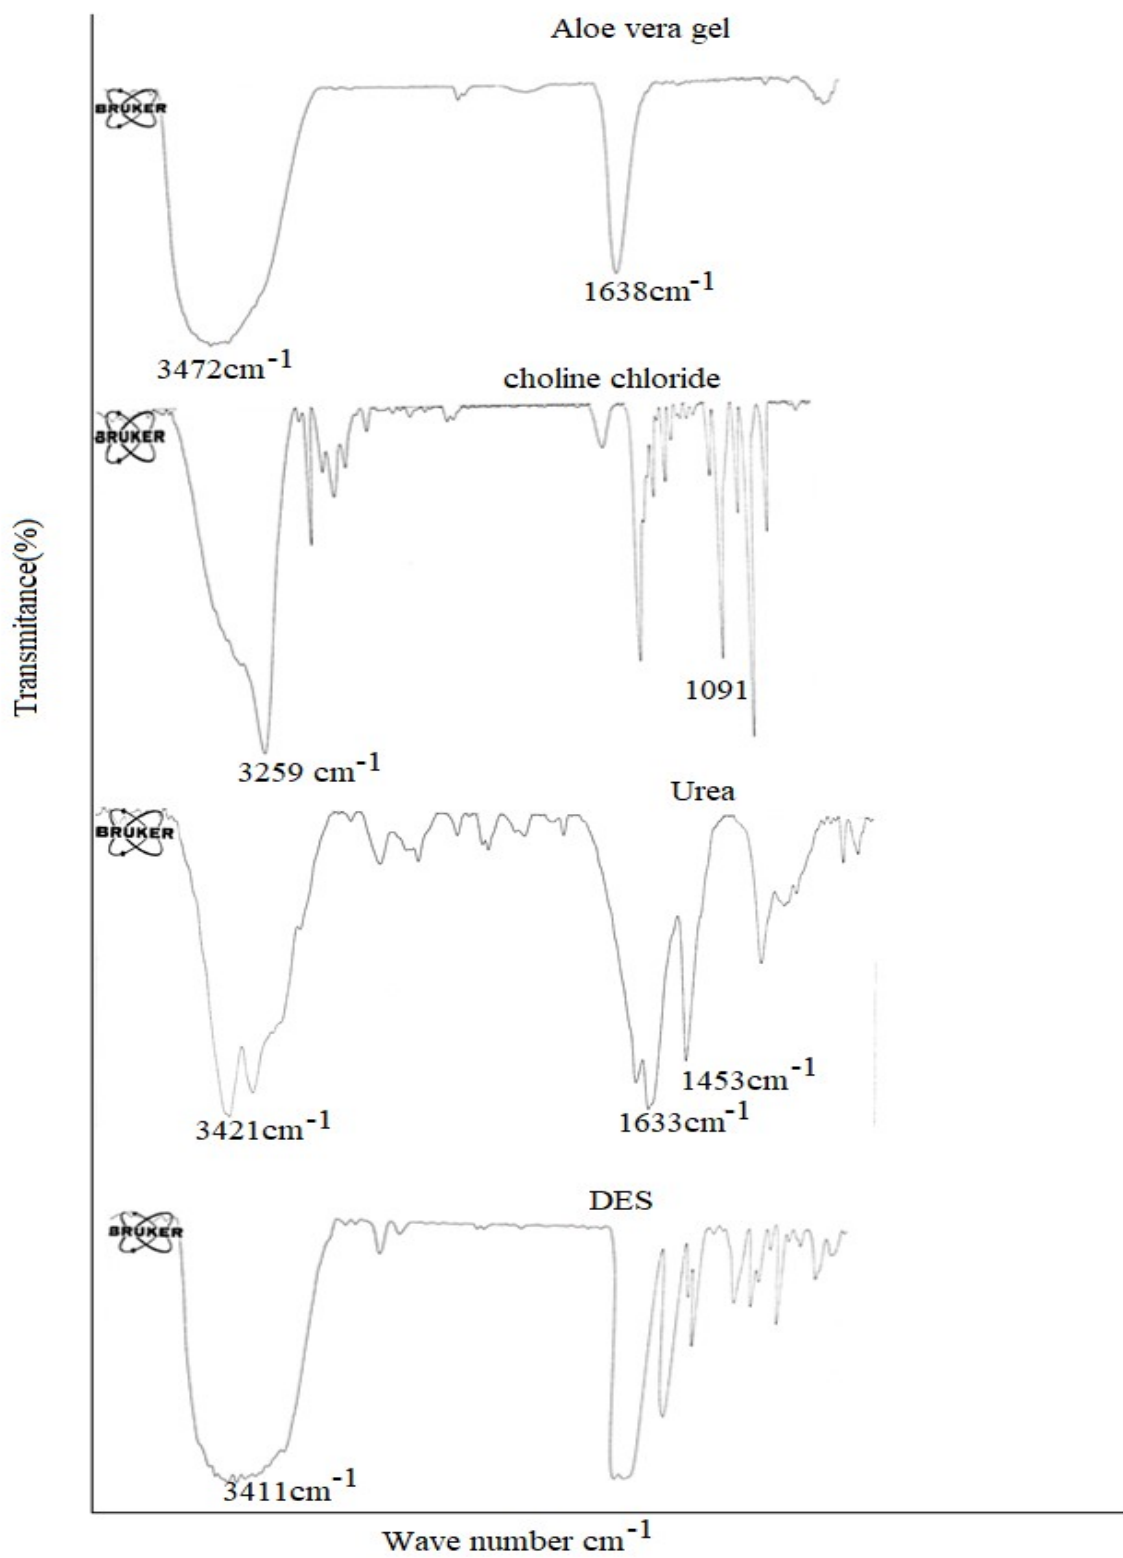

223

224

Figure S1

225

226

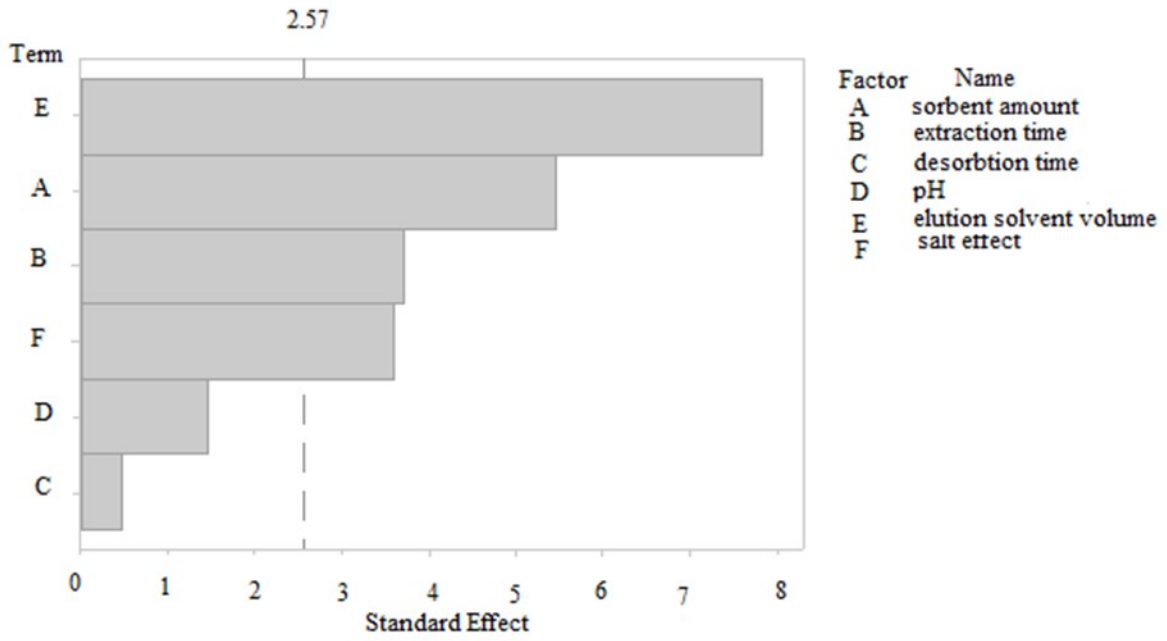

227

228

229

Figure S2

230

231

232

233

234

235

236

237

238

239

240

241

242

243

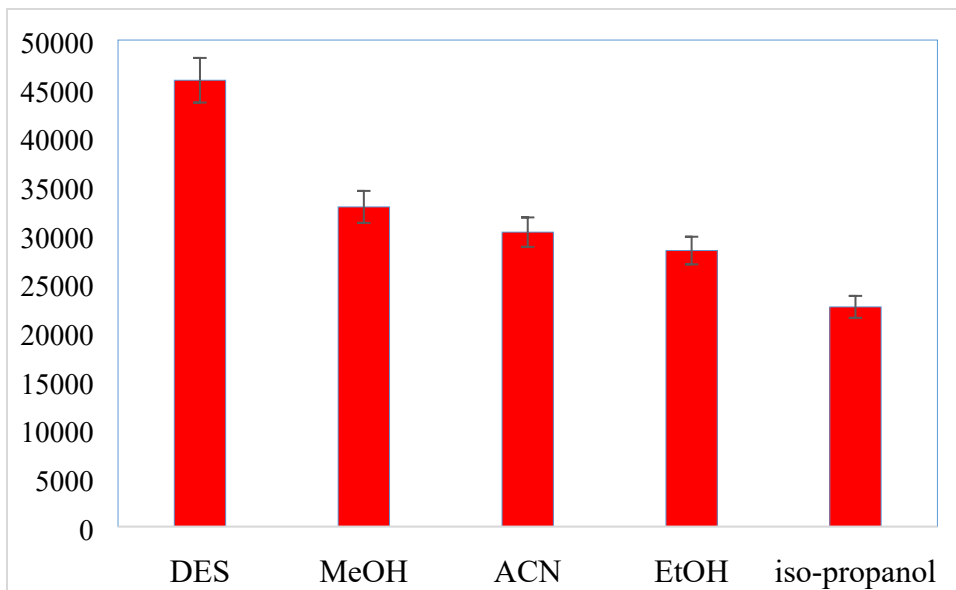

Figure S3

244

245

246

247

248

249

250

251

252

253

254

255

256

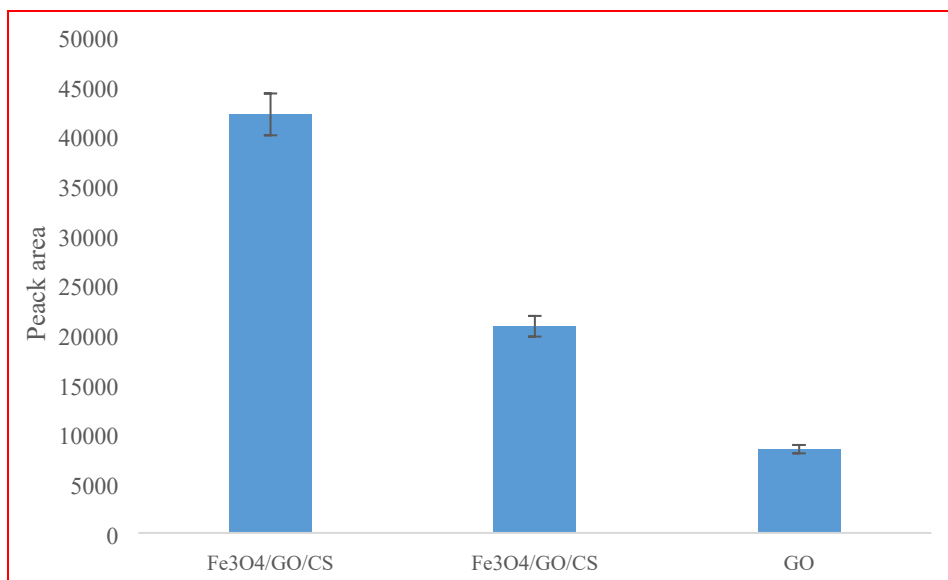

257

258

259

Figure S4
